# Supplementary material for: Computational Prediction of Human Salivary Proteins from Blood Circulation and Application to Diagnostic Biomarker Identification
Source: PLoS One. 2013 Nov 12;8(11):e80211. doi: 10.1371/journal.pone.0080211 (PMC3855806; doi:10.1371/journal.pone.0080211)
Supplement: Table S5 — Result of GO enrichment analysis among the top 1,000 ranked proteins. (XLS) [file pone.0080211.s005.xls]

## Sheet: GO_BP
Category	Term	Count	%	P-Value	Benjamini-Hochberg
GOTERM_BP_FAT	immune response	166	20.4	2.7e-80	5.9e-77
GOTERM_BP_FAT	antigen processing and presentation	41	5	1.1e-32	1.3e-29
GOTERM_BP_FAT	cell adhesion	88	10.8	1.3e-19	9.3e-17
GOTERM_BP_FAT	antigen processing and presentation of peptide or polysaccharide antigen via MHC class II	21	2.6	1.3e-19	7.4e-17
GOTERM_BP_FAT	biological adhesion	88	10.8	1.4e-19	6.1e-17
GOTERM_BP_FAT	defense response	79	9.7	3.7e-18	1.3e-15
GOTERM_BP_FAT	proteolysis	109	13.4	7e-18	2.2e-15
GOTERM_BP_FAT	response to wounding	72	8.9	7e-18	1.9e-15
GOTERM_BP_FAT	positive regulation of immune system process	45	5.5	1.5e-16	2.7e-14
GOTERM_BP_FAT	cell surface receptor linked signal transduction	145	17.9	5e-13	1.1e-10
GOTERM_BP_FAT	inflammatory response	47	5.8	1.1e-12	2.1e-10
GOTERM_BP_FAT	protein maturation by peptide bond cleavage	21	2.6	5.1e-10	9.3e-08
GOTERM_BP_FAT	positive regulation of immune response	27	3.3	6e-10	1e-07
GOTERM_BP_FAT	regulation of body fluid levels	26	3.2	1.7e-09	2.6e-07
GOTERM_BP_FAT	coagulation	22	2.7	2.1e-09	3e-07
GOTERM_BP_FAT	blood coagulation	22	2.7	2.1e-09	3e-07
GOTERM_BP_FAT	protein processing	23	2.8	2.2e-09	3e-07
GOTERM_BP_FAT	cell-cell signaling	60	7.4	2.8e-09	3.7e-07
GOTERM_BP_FAT	hemostasis	22	2.7	6.1e-09	7.4e-07
GOTERM_BP_FAT	positive regulation of response to stimulus	33	4.1	9.6e-09	1.1e-06
GOTERM_BP_FAT	protein maturation	23	2.8	1.1e-08	1.3e-06
GOTERM_BP_FAT	complement activation	14	1.7	1.4e-08	1.4e-06
GOTERM_BP_FAT	wound healing	29	3.6	1.5e-08	1.5e-06
GOTERM_BP_FAT	activation of plasma proteins involved in acute inflammatory response	14	1.7	1.9e-08	1.8e-06
GOTERM_BP_FAT	regulation of lymphocyte activation	25	3.1	2.2e-08	2e-06
GOTERM_BP_FAT	adaptive immune response based on somatic recombination of immune receptors built from immunoglobulin superfamily domains	18	2.2	2.4e-08	2.1e-06
GOTERM_BP_FAT	adaptive immune response	18	2.2	2.4e-08	2.1e-06
GOTERM_BP_FAT	regulation of cell proliferation	69	8.5	3.3e-08	2.8e-06
GOTERM_BP_FAT	acute inflammatory response	20	2.5	3.4e-08	2.8e-06
GOTERM_BP_FAT	humoral immune response	18	2.2	3.5e-08	2.8e-06
GOTERM_BP_FAT	regulation of cell activation	27	3.3	3.6e-08	2.8e-06
GOTERM_BP_FAT	regulation of leukocyte activation	26	3.2	5.1e-08	3.7e-06
GOTERM_BP_FAT	lymphocyte activation	28	3.4	1.4e-07	9.7e-06
GOTERM_BP_FAT	leukocyte activation	31	3.8	2.1e-07	1.5e-05
GOTERM_BP_FAT	lymphocyte mediated immunity	16	2	2.4e-07	1.6e-05
GOTERM_BP_FAT	positive regulation of cell proliferation	43	5.3	2.6e-07	1.7e-05
GOTERM_BP_FAT	positive regulation of cell activation	20	2.5	2.7e-07	1.7e-05
GOTERM_BP_FAT	immune effector process	22	2.7	3e-07	1.8e-05
GOTERM_BP_FAT	G-protein coupled receptor protein signaling pathway	85	10.5	4.6e-07	2.7e-05
GOTERM_BP_FAT	activation of immune response	18	2.2	5.1e-07	2.9e-05
GOTERM_BP_FAT	positive regulation of leukocyte activation	19	2.3	6.3e-07	3.5e-05
GOTERM_BP_FAT	cell activation	33	4.1	9.4e-07	5.1e-05
GOTERM_BP_FAT	regulation of response to external stimulus	23	2.8	1.4e-06	7.6e-05
GOTERM_BP_FAT	regulation of T cell activation	19	2.3	2.8e-06	0.00014
GOTERM_BP_FAT	second-messenger-mediated signaling	28	3.4	3.8e-06	0.00019
GOTERM_BP_FAT	leukocyte mediated immunity	16	2	3.8e-06	0.00019
GOTERM_BP_FAT	positive regulation of lymphocyte activation	17	2.1	3.9e-06	0.00019
GOTERM_BP_FAT	immunoglobulin mediated immune response	12	1.5	1.6e-05	0.00078
GOTERM_BP_FAT	regulation of blood coagulation	10	1.2	1.7e-05	0.00079
GOTERM_BP_FAT	antigen processing and presentation of peptide antigen	9	1.1	1.7e-05	0.00079
GOTERM_BP_FAT	Wnt receptor signaling pathway, calcium modulating pathway	8	1	1.9e-05	0.00085
GOTERM_BP_FAT	natural killer cell activation	8	1	1.9e-05	0.00085
GOTERM_BP_FAT	female pregnancy	17	2.1	2e-05	0.00089
GOTERM_BP_FAT	B cell mediated immunity	12	1.5	2.3e-05	0.001
GOTERM_BP_FAT	digestion	15	1.8	3.5e-05	0.0015
GOTERM_BP_FAT	G-protein signaling, coupled to cyclic nucleotide second messenger	17	2.1	3.6e-05	0.0015
GOTERM_BP_FAT	regulation of cAMP metabolic process	16	2	3.6e-05	0.0015
GOTERM_BP_FAT	negative regulation of blood coagulation	8	1	3.7e-05	0.0015
GOTERM_BP_FAT	cyclic-nucleotide-mediated signaling	18	2.2	4.6e-05	0.0018
GOTERM_BP_FAT	regulation of coagulation	10	1.2	5.2e-05	0.002
GOTERM_BP_FAT	antigen processing and presentation of peptide antigen via MHC class I	7	0.9	5.3e-05	0.002
GOTERM_BP_FAT	regulation of leukocyte mediated cytotoxicity	8	1	6.8e-05	0.0025
GOTERM_BP_FAT	negative regulation of coagulation	8	1	8.9e-05	0.0033
GOTERM_BP_FAT	positive regulation of T cell activation	13	1.6	9.7e-05	0.0035
GOTERM_BP_FAT	regulation of cyclic nucleotide metabolic process	16	2	0.00011	0.0038
GOTERM_BP_FAT	regulation of cAMP biosynthetic process	15	1.8	0.00011	0.0039
GOTERM_BP_FAT	cellular metal ion homeostasis	22	2.7	0.00012	0.0042
GOTERM_BP_FAT	cellular calcium ion homeostasis	21	2.6	0.00014	0.0046
GOTERM_BP_FAT	regulation of nucleotide metabolic process	16	2	0.00014	0.0048
GOTERM_BP_FAT	regulation of cell killing	8	1	0.00015	0.0049
GOTERM_BP_FAT	complement activation, classical pathway	8	1	0.00019	0.0061
GOTERM_BP_FAT	calcium ion homeostasis	21	2.6	0.00019	0.0062
GOTERM_BP_FAT	positive regulation of leukocyte mediated cytotoxicity	7	0.9	0.0002	0.0063
GOTERM_BP_FAT	regulation of lymphocyte proliferation	13	1.6	0.00023	0.0071
GOTERM_BP_FAT	metal ion homeostasis	22	2.7	0.00023	0.007
GOTERM_BP_FAT	regulation of mononuclear cell proliferation	13	1.6	0.00026	0.0077
GOTERM_BP_FAT	regulation of leukocyte proliferation	13	1.6	0.00026	0.0077
GOTERM_BP_FAT	regulation of locomotion	21	2.6	0.00026	0.0076
GOTERM_BP_FAT	heterophilic cell adhesion	7	0.9	0.00027	0.0078
GOTERM_BP_FAT	regulation of nucleotide biosynthetic process	15	1.8	0.00028	0.0081
GOTERM_BP_FAT	regulation of cyclic nucleotide biosynthetic process	15	1.8	0.00028	0.0081
GOTERM_BP_FAT	humoral immune response mediated by circulating immunoglobulin	8	1	0.0003	0.0084
GOTERM_BP_FAT	positive regulation of fibrinolysis	4	0.5	0.00031	0.0088
GOTERM_BP_FAT	innate immune response	17	2.1	0.00032	0.0088
GOTERM_BP_FAT	cellular di-, tri-valent inorganic cation homeostasis	23	2.8	0.00036	0.0099
GOTERM_BP_FAT	T cell activation	16	2	0.00036	0.0098
GOTERM_BP_FAT	tissue regeneration	8	1	0.00036	0.0097
GOTERM_BP_FAT	zymogen activation	5	0.6	0.00037	0.0098
GOTERM_BP_FAT	positive regulation of natural killer cell mediated immunity	6	0.7	0.00044	0.012
GOTERM_BP_FAT	positive regulation of natural killer cell mediated cytotoxicity	6	0.7	0.00044	0.012
GOTERM_BP_FAT	smooth muscle contraction	8	1	0.00045	0.011
GOTERM_BP_FAT	positive regulation of cell killing	7	0.9	0.00045	0.011
GOTERM_BP_FAT	positive regulation of signal transduction	27	3.3	0.00049	0.012
GOTERM_BP_FAT	negative regulation of cell proliferation	31	3.8	0.0005	0.013
GOTERM_BP_FAT	positive regulation of cell communication	29	3.6	0.00053	0.013
GOTERM_BP_FAT	chemotaxis	18	2.2	0.00058	0.014
GOTERM_BP_FAT	taxis	18	2.2	0.00058	0.014
GOTERM_BP_FAT	phasic smooth muscle contraction	5	0.6	0.0006	0.014
GOTERM_BP_FAT	regulation of natural killer cell mediated immunity	6	0.7	0.00061	0.014
GOTERM_BP_FAT	regulation of natural killer cell mediated cytotoxicity	6	0.7	0.00061	0.014
GOTERM_BP_FAT	neuropeptide signaling pathway	13	1.6	0.00067	0.016
GOTERM_BP_FAT	cellular cation homeostasis	24	3	0.0007	0.016
GOTERM_BP_FAT	di-, tri-valent inorganic cation homeostasis	23	2.8	0.00073	0.017
GOTERM_BP_FAT	regeneration	11	1.4	0.00074	0.017
GOTERM_BP_FAT	negative regulation of multicellular organismal process	18	2.2	0.00077	0.017
GOTERM_BP_FAT	cAMP-mediated signaling	13	1.6	0.00081	0.018
GOTERM_BP_FAT	negative regulation of immune system process	12	1.5	0.00088	0.019
GOTERM_BP_FAT	elevation of cytosolic calcium ion concentration	14	1.7	0.00094	0.02
GOTERM_BP_FAT	positive regulation of multicellular organismal process	23	2.8	0.00096	0.021
GOTERM_BP_FAT	G-protein signaling, coupled to cAMP nucleotide second messenger	12	1.5	0.0011	0.023
GOTERM_BP_FAT	regulation of cell migration	18	2.2	0.0011	0.023
GOTERM_BP_FAT	cellular defense response	10	1.2	0.0012	0.025
GOTERM_BP_FAT	fibrinolysis	5	0.6	0.0013	0.027
GOTERM_BP_FAT	regulation of T cell proliferation	10	1.2	0.0013	0.027
GOTERM_BP_FAT	regulation of immune effector process	13	1.6	0.0014	0.028
GOTERM_BP_FAT	positive regulation of natural killer cell mediated immune response to tumor cell	4	0.5	0.0015	0.03
GOTERM_BP_FAT	positive regulation of natural killer cell mediated cytotoxicity directed against tumor cell target	4	0.5	0.0015	0.03
GOTERM_BP_FAT	regulation of natural killer cell mediated cytotoxicity directed against tumor cell target	4	0.5	0.0015	0.03
GOTERM_BP_FAT	regulation of natural killer cell mediated immune response to tumor cell	4	0.5	0.0015	0.03
GOTERM_BP_FAT	regulation of lymphocyte differentiation	10	1.2	0.0015	0.03
GOTERM_BP_FAT	regulation of interleukin-2 production	7	0.9	0.0016	0.031
GOTERM_BP_FAT	Notch signaling pathway	9	1.1	0.0017	0.032
GOTERM_BP_FAT	activation of phospholipase C activity by G-protein coupled receptor protein signaling pathway coupled to IP3 second messenger	9	1.1	0.0017	0.032
GOTERM_BP_FAT	cytosolic calcium ion homeostasis	14	1.7	0.0018	0.035
GOTERM_BP_FAT	positive regulation of phospholipase C activity	10	1.2	0.0019	0.036
GOTERM_BP_FAT	activation of phospholipase C activity	10	1.2	0.0019	0.036
GOTERM_BP_FAT	cell migration	24	3	0.0021	0.04
GOTERM_BP_FAT	regulation of lymphocyte mediated immunity	9	1.1	0.0021	0.04
GOTERM_BP_FAT	negative regulation of leukocyte proliferation	7	0.9	0.0022	0.042
GOTERM_BP_FAT	negative regulation of lymphocyte proliferation	7	0.9	0.0022	0.042
GOTERM_BP_FAT	negative regulation of mononuclear cell proliferation	7	0.9	0.0022	0.042
GOTERM_BP_FAT	positive regulation of phospholipase activity	10	1.2	0.0028	0.052
GOTERM_BP_FAT	regulation of adenylate cyclase activity	12	1.5	0.0029	0.053
GOTERM_BP_FAT	positive regulation of lymphocyte mediated immunity	7	0.9	0.0031	0.056
GOTERM_BP_FAT	regulation of vasoconstriction	7	0.9	0.0031	0.056
GOTERM_BP_FAT	positive regulation of leukocyte mediated immunity	7	0.9	0.0031	0.056
GOTERM_BP_FAT	cation homeostasis	24	3	0.0033	0.059
GOTERM_BP_FAT	positive regulation of locomotion	12	1.5	0.0034	0.06
GOTERM_BP_FAT	regulation of phospholipase activity	10	1.2	0.0035	0.06
GOTERM_BP_FAT	positive regulation of lymphocyte differentiation	7	0.9	0.0036	0.062
GOTERM_BP_FAT	regulation of cyclase activity	12	1.5	0.0037	0.064
GOTERM_BP_FAT	regulation of response to tumor cell	4	0.5	0.0039	0.066
GOTERM_BP_FAT	positive regulation of immune response to tumor cell	4	0.5	0.0039	0.066
GOTERM_BP_FAT	positive regulation of response to tumor cell	4	0.5	0.0039	0.066
GOTERM_BP_FAT	regulation of immune response to tumor cell	4	0.5	0.0039	0.066
GOTERM_BP_FAT	positive regulation of response to biotic stimulus	4	0.5	0.0039	0.066
GOTERM_BP_FAT	positive regulation of peptidyl-tyrosine phosphorylation	8	1	0.0039	0.066
GOTERM_BP_FAT	positive regulation of mitosis	6	0.7	0.0039	0.065
GOTERM_BP_FAT	positive regulation of nuclear division	6	0.7	0.0039	0.065
GOTERM_BP_FAT	regulation of alpha-beta T cell activation	7	0.9	0.0042	0.069
GOTERM_BP_FAT	water homeostasis	5	0.6	0.0042	0.069
GOTERM_BP_FAT	negative regulation of protein secretion	5	0.6	0.0042	0.069
GOTERM_BP_FAT	regulation of lyase activity	12	1.5	0.0043	0.07
GOTERM_BP_FAT	regulation of cell motion	18	2.2	0.0044	0.072
GOTERM_BP_FAT	regulation of leukocyte mediated immunity	9	1.1	0.0046	0.074
GOTERM_BP_FAT	phosphoinositide-mediated signaling	11	1.4	0.0047	0.075
GOTERM_BP_FAT	positive regulation of lipase activity	10	1.2	0.005	0.079
GOTERM_BP_FAT	angiogenesis	15	1.8	0.005	0.079
GOTERM_BP_FAT	positive regulation of cell migration	11	1.4	0.0051	0.079
GOTERM_BP_FAT	regulation of protein kinase B signaling cascade	5	0.6	0.0053	0.082
GOTERM_BP_FAT	negative regulation of T cell proliferation	6	0.7	0.0055	0.084
GOTERM_BP_FAT	regulation of fibrinolysis	4	0.5	0.0056	0.085
GOTERM_BP_FAT	regulation of T cell differentiation	8	1	0.0062	0.092
GOTERM_BP_FAT	negative regulation of neurological system process	6	0.7	0.0065	0.096
GOTERM_BP_FAT	positive regulation of G-protein coupled receptor protein signaling pathway	4	0.5	0.0078	0.11
GOTERM_BP_FAT	cell motility	24	3	0.0078	0.11
GOTERM_BP_FAT	localization of cell	24	3	0.0078	0.11
GOTERM_BP_FAT	regulation of interleukin-2 biosynthetic process	5	0.6	0.0081	0.12
GOTERM_BP_FAT	locomotory behavior	22	2.7	0.0084	0.12
GOTERM_BP_FAT	negative regulation of lymphocyte activation	8	1	0.0084	0.12
GOTERM_BP_FAT	regulation of innate immune response	8	1	0.0084	0.12
GOTERM_BP_FAT	positive regulation of transport	19	2.3	0.0085	0.12
GOTERM_BP_FAT	regulation of peptidyl-tyrosine phosphorylation	9	1.1	0.009	0.12
GOTERM_BP_FAT	negative regulation of T cell activation	7	0.9	0.009	0.12
GOTERM_BP_FAT	cell-cell adhesion	22	2.7	0.009	0.12
GOTERM_BP_FAT	positive regulation of lymphocyte proliferation	8	1	0.0093	0.13
GOTERM_BP_FAT	negative regulation of secretion	8	1	0.0093	0.13
GOTERM_BP_FAT	cell recognition	8	1	0.0093	0.13
GOTERM_BP_FAT	activation of adenylate cyclase activity	8	1	0.0093	0.13
GOTERM_BP_FAT	positive regulation of cell motion	11	1.4	0.01	0.13
GOTERM_BP_FAT	positive regulation of leukocyte proliferation	8	1	0.01	0.14
GOTERM_BP_FAT	positive regulation of adenylate cyclase activity	8	1	0.01	0.14
GOTERM_BP_FAT	positive regulation of mononuclear cell proliferation	8	1	0.01	0.14
GOTERM_BP_FAT	positive regulation of CD4-positive, alpha beta T cell differentiation	4	0.5	0.01	0.14
GOTERM_BP_FAT	regulation of dopamine secretion	4	0.5	0.01	0.14
GOTERM_BP_FAT	negative regulation of leukocyte activation	8	1	0.011	0.15
GOTERM_BP_FAT	positive regulation of cyclase activity	8	1	0.011	0.15
GOTERM_BP_FAT	leukocyte migration	8	1	0.011	0.15
GOTERM_BP_FAT	positive regulation of immune effector process	7	0.9	0.011	0.15
GOTERM_BP_FAT	positive regulation of T cell differentiation	6	0.7	0.012	0.15
GOTERM_BP_FAT	regulation of acute inflammatory response	5	0.6	0.012	0.15
GOTERM_BP_FAT	temperature homeostasis	5	0.6	0.012	0.15
GOTERM_BP_FAT	cellular ion homeostasis	27	3.3	0.012	0.16
GOTERM_BP_FAT	regulation of protein secretion	8	1	0.012	0.16
GOTERM_BP_FAT	regulation of cytokine production	16	2	0.012	0.16
GOTERM_BP_FAT	regulation of lipase activity	10	1.2	0.013	0.16
GOTERM_BP_FAT	behavior	32	3.9	0.013	0.16
GOTERM_BP_FAT	elevation of cytosolic calcium ion concentration during G-protein signaling, coupled to IP3 second messenger (phospholipase C activating)	4	0.5	0.013	0.16
GOTERM_BP_FAT	positive regulation of lyase activity	8	1	0.013	0.17
GOTERM_BP_FAT	positive regulation of innate immune response	7	0.9	0.014	0.17
GOTERM_BP_FAT	cellular chemical homeostasis	27	3.3	0.015	0.18
GOTERM_BP_FAT	regulation of secretion	17	2.1	0.015	0.18
GOTERM_BP_FAT	cell motion	32	3.9	0.015	0.18
GOTERM_BP_FAT	negative regulation of cell activation	8	1	0.016	0.19
GOTERM_BP_FAT	regulation of systemic arterial blood pressure	6	0.7	0.017	0.19
GOTERM_BP_FAT	regulation of alpha-beta T cell proliferation	4	0.5	0.017	0.19
GOTERM_BP_FAT	regulation of dopamine uptake	3	0.4	0.017	0.2
GOTERM_BP_FAT	regulation of catecholamine uptake during transmission of nerve impulse	3	0.4	0.017	0.2
GOTERM_BP_FAT	positive regulation of insulin-like growth factor receptor signaling pathway	3	0.4	0.017	0.2
GOTERM_BP_FAT	blood coagulation, extrinsic pathway	3	0.4	0.017	0.2
GOTERM_BP_FAT	positive regulation of secretion	11	1.4	0.02	0.22
GOTERM_BP_FAT	negative regulation of G-protein coupled receptor protein signaling pathway	4	0.5	0.021	0.23
GOTERM_BP_FAT	negative regulation of transmission of nerve impulse	5	0.6	0.021	0.24
GOTERM_BP_FAT	blood vessel morphogenesis	17	2.1	0.022	0.24
GOTERM_BP_FAT	regulation of B cell activation	7	0.9	0.022	0.24
GOTERM_BP_FAT	regulation of G-protein coupled receptor protein signaling pathway	7	0.9	0.022	0.24
GOTERM_BP_FAT	positive regulation of JAK-STAT cascade	5	0.6	0.025	0.26
GOTERM_BP_FAT	positive regulation of alpha-beta T cell activation	5	0.6	0.025	0.26
GOTERM_BP_FAT	regulation of CD4-positive, alpha beta T cell differentiation	4	0.5	0.025	0.27
GOTERM_BP_FAT	peristalsis	3	0.4	0.025	0.27
GOTERM_BP_FAT	complement activation, lectin pathway	3	0.4	0.025	0.27
GOTERM_BP_FAT	regulation of protein maturation by peptide bond cleavage	3	0.4	0.025	0.27
GOTERM_BP_FAT	regulation of neurotransmitter uptake	3	0.4	0.025	0.27
GOTERM_BP_FAT	regulation of protein processing	3	0.4	0.025	0.27
GOTERM_BP_FAT	positive regulation of T cell proliferation	6	0.7	0.026	0.27
GOTERM_BP_FAT	regulation of homeostatic process	11	1.4	0.026	0.27
GOTERM_BP_FAT	regulation of proteolysis	7	0.9	0.027	0.27
GOTERM_BP_FAT	regulation of system process	22	2.7	0.028	0.29
GOTERM_BP_FAT	regulation of adenylate cyclase activity involved in G-protein signaling	6	0.7	0.028	0.29
GOTERM_BP_FAT	positive regulation of adenylate cyclase activity by G-protein signaling pathway	6	0.7	0.028	0.29
GOTERM_BP_FAT	activation of adenylate cyclase activity by G-protein signaling pathway	6	0.7	0.028	0.29
GOTERM_BP_FAT	feeding behavior	8	1	0.03	0.3
GOTERM_BP_FAT	Wnt receptor signaling pathway	12	1.5	0.03	0.3
GOTERM_BP_FAT	regulation of adaptive immune response based on somatic recombination of immune receptors built from immunoglobulin superfamily domains	7	0.9	0.031	0.31
GOTERM_BP_FAT	ion homeostasis	27	3.3	0.033	0.32
GOTERM_BP_FAT	regulation of adaptive immune response	7	0.9	0.034	0.33
GOTERM_BP_FAT	lymphocyte chemotaxis	3	0.4	0.034	0.33
GOTERM_BP_FAT	negative regulation of synaptic transmission, glutamatergic	3	0.4	0.034	0.33
GOTERM_BP_FAT	T cell mediated immunity	3	0.4	0.034	0.33
GOTERM_BP_FAT	immune response-regulating cell surface receptor signaling pathway	6	0.7	0.034	0.33
GOTERM_BP_FAT	regulation of neurological system process	13	1.6	0.034	0.33
GOTERM_BP_FAT	developmental growth	9	1.1	0.035	0.33
GOTERM_BP_FAT	viral infectious cycle	6	0.7	0.037	0.35
GOTERM_BP_FAT	chemical homeostasis	32	3.9	0.038	0.35
GOTERM_BP_FAT	positive regulation of defense response	8	1	0.039	0.35
GOTERM_BP_FAT	positive regulation of protein amino acid phosphorylation	9	1.1	0.039	0.36
GOTERM_BP_FAT	positive regulation of smooth muscle contraction	4	0.5	0.041	0.37
GOTERM_BP_FAT	regulation of protein kinase cascade	18	2.2	0.044	0.39
GOTERM_BP_FAT	diuresis	3	0.4	0.044	0.39
GOTERM_BP_FAT	behavioral response to cocaine	3	0.4	0.044	0.39
GOTERM_BP_FAT	regulation of inflammatory response	8	1	0.046	0.4
GOTERM_BP_FAT	vasculature development	18	2.2	0.047	0.4
GOTERM_BP_FAT	response to tropane	4	0.5	0.047	0.4
GOTERM_BP_FAT	response to cocaine	4	0.5	0.047	0.4
GOTERM_BP_FAT	regulation of synaptic transmission, glutamatergic	4	0.5	0.047	0.4
GOTERM_BP_FAT	regulation of catecholamine secretion	4	0.5	0.047	0.4
GOTERM_BP_FAT	regulation of behavior	6	0.7	0.048	0.41
GOTERM_BP_FAT	regulation of multicellular organism growth	7	0.9	0.048	0.41

## Sheet: GO_CC
Category	Term	Count	%	P-Value	Benjamini-Hochberg
GOTERM_CC_FAT	extracellular region	298	36.7	3.7e-62	9.6e-60
GOTERM_CC_FAT	intrinsic to membrane	489	60.2	2.3e-39	3e-37
GOTERM_CC_FAT	integral to membrane	465	57.3	7.2e-34	6.2e-32
GOTERM_CC_FAT	MHC protein complex	37	4.6	7.4e-31	4.8e-29
GOTERM_CC_FAT	plasma membrane	357	44	1.6e-28	8e-27
GOTERM_CC_FAT	intrinsic to plasma membrane	151	18.6	1.7e-20	7.3e-19
GOTERM_CC_FAT	integral to plasma membrane	145	17.9	6.4e-19	2.3e-17
GOTERM_CC_FAT	MHC class II protein complex	21	2.6	7.9e-19	2.5e-17
GOTERM_CC_FAT	plasma membrane part	216	26.6	6.1e-17	3.2e-15
GOTERM_CC_FAT	extracellular region part	120	14.8	3.4e-16	8.5e-15
GOTERM_CC_FAT	extracellular space	95	11.7	1.3e-15	3.1e-14
GOTERM_CC_FAT	MHC class I protein complex	16	2	4.3e-12	9.1e-11
GOTERM_CC_FAT	external side of plasma membrane	37	4.6	6.9e-12	1.4e-10
GOTERM_CC_FAT	cell surface	55	6.8	2.1e-11	3.9e-10
GOTERM_CC_FAT	anchored to membrane	38	4.7	3.5e-09	6.1e-08
GOTERM_CC_FAT	viral envelope	6	0.7	3.1e-05	0.00049
GOTERM_CC_FAT	viral capsid	7	0.9	0.00018	0.0027
GOTERM_CC_FAT	virion part	7	0.9	0.00026	0.0037
GOTERM_CC_FAT	virion	7	0.9	0.00026	0.0037
GOTERM_CC_FAT	anchored to plasma membrane	7	0.9	0.0012	0.016
GOTERM_CC_FAT	TAP complex	4	0.5	0.0056	0.07
GOTERM_CC_FAT	MHC class I peptide loading complex	4	0.5	0.012	0.14
GOTERM_CC_FAT	extracellular matrix	30	3.7	0.027	0.27
GOTERM_CC_FAT	membrane raft	15	1.8	0.037	0.34
GOTERM_CC_FAT	proteinaceous extracellular matrix	27	3.3	0.049	0.42

## Sheet: GO_MF
Category	Term	Count	%	P-value	Benjamini-Hochberg
GOTERM_MF_FAT	serine-type endopeptidase activity	89	11	2.2e-85	1e-82
GOTERM_MF_FAT	serine-type peptidase activity	89	11	7.6e-78	1.8e-75
GOTERM_MF_FAT	serine hydrolase activity	89	11	2.7e-77	4.2e-75
GOTERM_MF_FAT	endopeptidase activity	93	11.5	1.7e-49	2e-47
GOTERM_MF_FAT	peptidase activity, acting on L-amino acid peptides	93	11.5	6e-35	5.6e-33
GOTERM_MF_FAT	peptidase activity	93	11.5	2.3e-33	1.8e-31
GOTERM_MF_FAT	antigen binding	27	3.3	1.6e-22	1e-20
GOTERM_MF_FAT	MHC class II receptor activity	17	2.1	1.4e-20	8.2e-19
GOTERM_MF_FAT	MHC class I receptor activity	14	1.7	6.5e-16	3.4e-14
GOTERM_MF_FAT	sugar binding	37	4.6	2.2e-15	1e-13
GOTERM_MF_FAT	carbohydrate binding	47	5.8	2.4e-13	1e-11
GOTERM_MF_FAT	amine receptor activity	14	1.7	2.1e-09	8.1e-08
GOTERM_MF_FAT	IgG binding	7	0.9	7.9e-08	2.8e-06
GOTERM_MF_FAT	calcium ion binding	69	8.5	8.7e-08	2.9e-06
GOTERM_MF_FAT	scavenger receptor activity	13	1.6	1e-07	3.1e-06
GOTERM_MF_FAT	hormone activity	19	2.3	1.3e-07	3.7e-06
GOTERM_MF_FAT	immunoglobulin binding	8	1	5.6e-07	1.5e-05
GOTERM_MF_FAT	cytokine receptor activity	13	1.6	8.3e-07	2.1e-05
GOTERM_MF_FAT	chemokine activity	12	1.5	9e-07	2.2e-05
GOTERM_MF_FAT	cytokine activity	24	3	1.5e-06	3.6e-05
GOTERM_MF_FAT	chemokine receptor binding	12	1.5	1.8e-06	3.9e-05
GOTERM_MF_FAT	MHC protein binding	9	1.1	2.6e-06	5.5e-05
GOTERM_MF_FAT	cytokine binding	17	2.1	3.6e-06	7.3e-05
GOTERM_MF_FAT	protein complex binding	21	2.6	6.2e-05	0.0012
GOTERM_MF_FAT	peptide binding	21	2.6	0.0001	0.0019
GOTERM_MF_FAT	peptide receptor activity, G-protein coupled	15	1.8	0.00011	0.002
GOTERM_MF_FAT	peptide receptor activity	15	1.8	0.00011	0.002
GOTERM_MF_FAT	Notch binding	5	0.6	0.00023	0.0039
GOTERM_MF_FAT	neurotransmitter receptor activity	13	1.6	0.00026	0.0043
GOTERM_MF_FAT	growth factor activity	17	2.1	0.00044	0.0071
GOTERM_MF_FAT	neurotransmitter binding	13	1.6	0.00055	0.0085
GOTERM_MF_FAT	growth factor binding	13	1.6	0.00065	0.0098
GOTERM_MF_FAT	neuropeptide receptor activity	8	1	0.00071	0.01
GOTERM_MF_FAT	neuropeptide binding	8	1	0.00083	0.012
GOTERM_MF_FAT	chemoattractant activity	4	0.5	0.001	0.014
GOTERM_MF_FAT	integrin binding	9	1.1	0.0017	0.023
GOTERM_MF_FAT	MHC class I protein binding	5	0.6	0.0027	0.034
GOTERM_MF_FAT	serotonin binding	4	0.5	0.0039	0.048
GOTERM_MF_FAT	interleukin-2 receptor activity	3	0.4	0.0043	0.051
GOTERM_MF_FAT	inhibitory MHC class I receptor activity	3	0.4	0.0043	0.051
GOTERM_MF_FAT	interleukin-2 binding	3	0.4	0.0043	0.051
GOTERM_MF_FAT	phospholipase activity	10	1.2	0.0043	0.05
GOTERM_MF_FAT	extracellular matrix structural constituent	10	1.2	0.0055	0.062
GOTERM_MF_FAT	drug binding	8	1	0.0058	0.063
GOTERM_MF_FAT	coreceptor activity	5	0.6	0.0063	0.067
GOTERM_MF_FAT	amine binding	11	1.4	0.0093	0.097
GOTERM_MF_FAT	neuropeptide hormone activity	5	0.6	0.01	0.11
GOTERM_MF_FAT	serotonin receptor activity	4	0.5	0.012	0.12
GOTERM_MF_FAT	G-protein coupled acetylcholine receptor activity	3	0.4	0.013	0.13
GOTERM_MF_FAT	muscarinic acetylcholine receptor activity	3	0.4	0.013	0.13
GOTERM_MF_FAT	dopamine receptor activity	3	0.4	0.013	0.13
GOTERM_MF_FAT	insulin-like growth factor binding	5	0.6	0.014	0.13
GOTERM_MF_FAT	phosphoinositide phospholipase C activity	5	0.6	0.014	0.13
GOTERM_MF_FAT	lipase activity	10	1.2	0.014	0.13
GOTERM_MF_FAT	phospholipase A2 activity	5	0.6	0.016	0.14
GOTERM_MF_FAT	lipoprotein receptor activity	4	0.5	0.018	0.15
GOTERM_MF_FAT	endopeptidase inhibitor activity	12	1.5	0.023	0.19
GOTERM_MF_FAT	cell adhesion molecule binding	5	0.6	0.026	0.21
GOTERM_MF_FAT	phospholipase C activity	5	0.6	0.029	0.23
GOTERM_MF_FAT	peptidase inhibitor activity	12	1.5	0.033	0.25
GOTERM_MF_FAT	pattern binding	12	1.5	0.034	0.25
GOTERM_MF_FAT	polysaccharide binding	12	1.5	0.034	0.25
GOTERM_MF_FAT	lipoprotein binding	5	0.6	0.043	0.31
GOTERM_MF_FAT	dopamine binding	3	0.4	0.044	0.31
